# Supplementary material for: Corrigendum to “GK-1 Improves the Immune Response Induced by Bone Marrow Dendritic Cells Loaded with MAGE-AX in Mice with Melanoma”
Source: Hindawi journal article supplement (doi:10.1155/2015/176840), 2015-12-28
Supplement: f1 [file 176840.f1.pdf]

Supplementary material of Corrigendum to “GK-1 Improves the Immune Response Induced by Bone Marrow Dendritic Cells Loaded with MAGE-AX in Mice with Melanoma”

Authors: Gabriela Piñón-Zárate, Miguel Ángel Herrera-Enríquez, Beatriz Hernández-Téllez, Katia Jarquín-Yáñez, Andrés Eliú Castell-Rodríguez\*.

Affiliation: Laboratorio de Inmunoterapia e Ingeniería de Tejidos, Departamento de Biología Celular y Tisular, Facultad de Medicina, Universidad Nacional Autónoma de México. Distrito Federal, México. 04510

\*Corresponding Author: Andrés Eliú Castell-Rodríguez, M.D., Ph. D. Laboratorio de Inmunoterapia e Ingeniería de Tejidos, Edificio A, sexto piso, Departamento de Biología Celular y Tisular, Facultad de Medicina, Ciudad Universitaria. Av. Universidad No. 3000, Universidad Nacional Autónoma de México, Distrito Federal, México 04510

Email: [castell@unam.mx](mailto:castell@unam.mx)

### **Supplementary material**

Groups of three to five C57BL/6 mice were inoculated subcutaneously; first with 10mg/ml de GK-1 (Segura et al. 2009) and 24 hours later with  $5 \times 10^5$  bone marrow dendritic cells (BMDCs) treated with MAGE-AX (BMDCs/MAGE-AX) once a week during a month. Once mice have completed the dendritic cells based immunotherapy, they were inoculated subcutaneously with  $1 \times 10^5$  B16-F10 melanoma cells. Mice control groups were inoculated with PBS, BMDCs or BMDCs treated with MAGE-AX once a week during a month and later inoculated with  $1 \times 10^5$  B16-F10 melanoma cells. All control groups did not receive GK-1. An ANOVA test was performed followed by a Tukey's test in order to evaluate the significance of the effects of the different treatments. A P value  $<0.05$  was considered statistically significant.

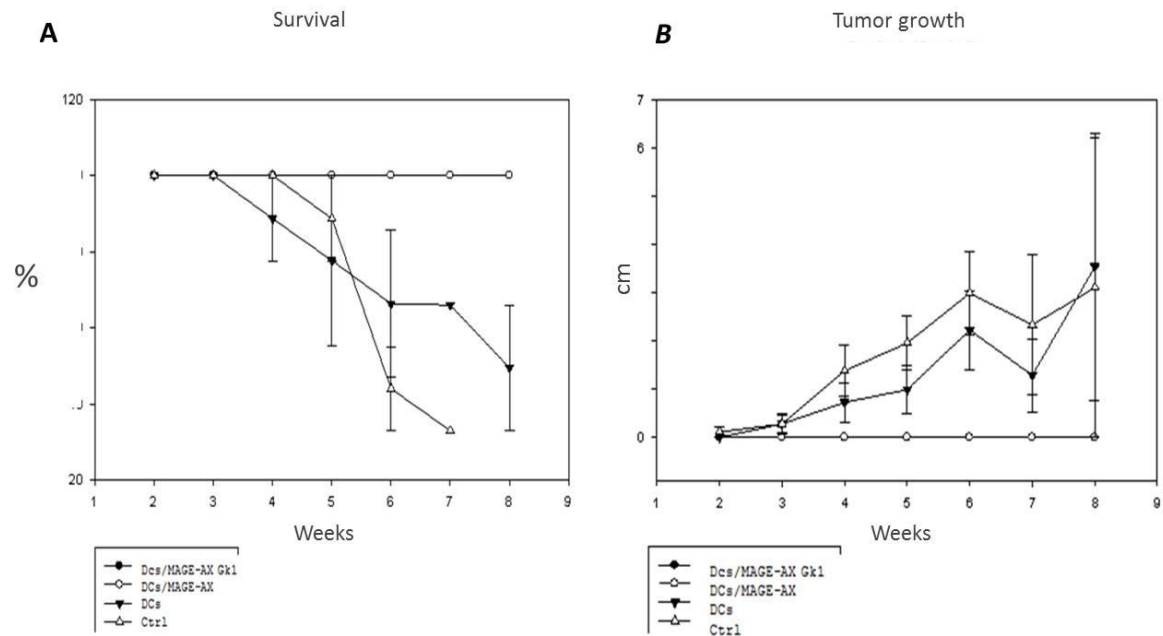

**Figure A. Mice survival.** Mice inoculated with GK-1 and BMDCs/MAGE-AX or BMDCs/MAGE-AX showed 100% of survivor eight weeks after melanoma cell inoculation.

**Figure B. Tumor Growth.** All mice groups developed tumors with 2-3 mm tumor-diameter two weeks after melanoma cells inoculation. Mice groups treated with DCs-MAGE-AX and inoculated with GK-1 or DCs/MAGE-AX showed diminished tumor-diameter until they disappeared. This phenomenon is named tumor regression.

**Reference**

Segura-Velázquez R, Fragoso G,<sup>1</sup> Sciutto E and Sarukhan A. 2009. Towards Identification of the Mechanisms of Action of Parasite-Derived Peptide GK1 on the Immunogenicity of an Influenza Vaccine. *Clinical and vaccine immunology* 2009; 16: 1338–1343
